# Supplementary material for: Phenylethanoid Glycoside-Enriched Extract Prepared from Clerodendrum chinense Leaf Inhibits A549 Lung Cancer Cell Migration and Apoptosis Induction through Enhancing ROS Production
Source: MDPI journal article supplement (doi:10.3390/antiox12020461), 2023-02-11
Supplement: s1 [file s1]

# **Phenylethanoid glycoside-enriched extract prepared from *Clerodendrum chinense* leaf inhibits A549 lung cell migration and apoptosis induction through enhancing ROS production**

Chuda Chittasupho<sup>1</sup>, Sirivan Athikomkulchai<sup>2</sup>, Weerasak Samee<sup>3</sup>, Mingkwan Na Takuathung<sup>4</sup>, Wipawadee Yooi<sup>1, 5</sup>, Kasirawat Sawangrat<sup>1, 5</sup>, Chalermpong Saenjum<sup>1, 5\*</sup>

<sup>1</sup>Department of Pharmaceutical Sciences, Faculty of Pharmacy, Chiang Mai University, Mueang, Chiang Mai 50200, Thailand

<sup>2</sup>Department of Pharmacognosy, Faculty of Pharmacy, Srinakharinwirot University, Ongkharak, Nahonnayok 26120, Thailand

<sup>3</sup>Department of Pharmaceutical Chemistry, Faculty of Pharmacy, Srinakharinwirot University, Ongkharak, Nahonnayok 26120, Thailand

<sup>4</sup>Department of Pharmacology, Faculty of Medicine, Chiang Mai University 50200, Thailand

<sup>5</sup>Center of Excellence for Innovation in Analytical Science and Technology for Biodiversity-Based Economic and Society (I-ANALY-S-T\_B.BES-CMU), Chiang Mai University, Chiang Mai 50200, Thailand

\*Corresponding author. E-mail: chalermpong.s@cmu.ac.th

**Supplementary Table S1.** Phytochemical analysis of *C. chinense* leaf ethanol extract.

| Test                            | Results                                |
|---------------------------------|----------------------------------------|
| Flavonoids                      |                                        |
| Shinoda test                    | ++ (Red-orange color)                  |
| Phenolic compounds              |                                        |
| Ferric chloride test            | +++ (Greenish-blue color)              |
| Tannin                          |                                        |
| Gelatin solution                | +++ (Precipitation)                    |
| Lead acetate saturated solution | +++ (Precipitation)                    |
| 1% Ferric chloride              | +++ (Greenish-black color)             |
| Alkaloids                       |                                        |
| Dragendorff's reagent           | + (Orange precipitation)               |
| Scheibler's reagent             | + (White precipitation)                |
| Terpenoids                      |                                        |
| Salkoski test                   | + (Reddish-brown color ring interface) |

+ Presence – Absence

## Supplementary data of cytotoxicity study

### Cell culture and cytotoxicity assay

The human colorectal adenocarcinoma Caco-2, human colorectal carcinoma HCT 116, hepatocellular carcinoma HepG2 cells were obtained from American Type Culture Collection (Manassas, VA). The cells were cultured in DMEM containing 10%FBS, 100 U/mL penicillin-streptomycin under at 37 °C and 5% CO<sub>2</sub>. For the viability assay, the cells (5x10<sup>3</sup> cells) were seeded into each well of a 96-well plate and incubated with and without the sample at different concentrations (0–200 µg/mL) for 72 h. Then, the cultured media was removed and the new cultured media containing cell viability reagent namely PrestoBlue was added and incubated at 37 °C for 1 h. The color intensity was measured at 560 and 595 nm using a microplate reader. The cell viability of the tested sample was calculated compared to the negative control.

### Results

The cytotoxicity of *C. chinense* leaf extract was investigated in human colorectal adenocarcinoma cell line (Caco-2), human colorectal carcinoma cell line (HCT 116), and human hepatocellular carcinoma cell line (HepG2). The results showed that at 200 µg/mL the extract showed cytotoxicity against all tested cancer cell lines. The IC<sub>50</sub> values of *C. chinense* leaf extract against Caco-2, HCT 116, and HepG2 cells were 370.95±21.00 µg/mL, 274.45±5.30 µg/mL, and 202.95±1.06 µg/mL, respectively. These results indicated that *C. chinense* leaf extract also exhibited anti-cancer activities against colorectal and liver cancer cells, confirming the anti-cancer activity of *C. chinense* leaf extract.

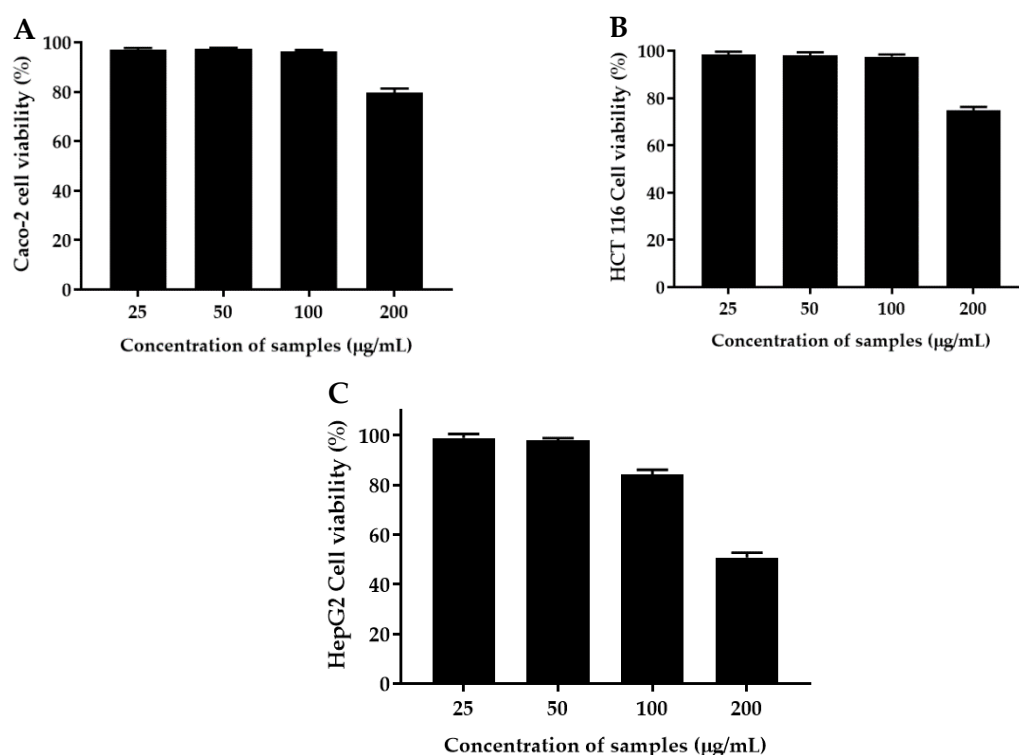

**Figure S1** The viability of (A) Caco-2 (B) HCT 116, and (C) HepG2 cells after incubation with *C. chinense* leaf extract. Data are shown as the mean ± SD (n = 3).
